# Supplementary material
Source: publisher figshare collection journal article supplement (https://acs.figshare.com/ndownloader/files/5671695)
Supplement: Supplementary file 1 [file 5671695]

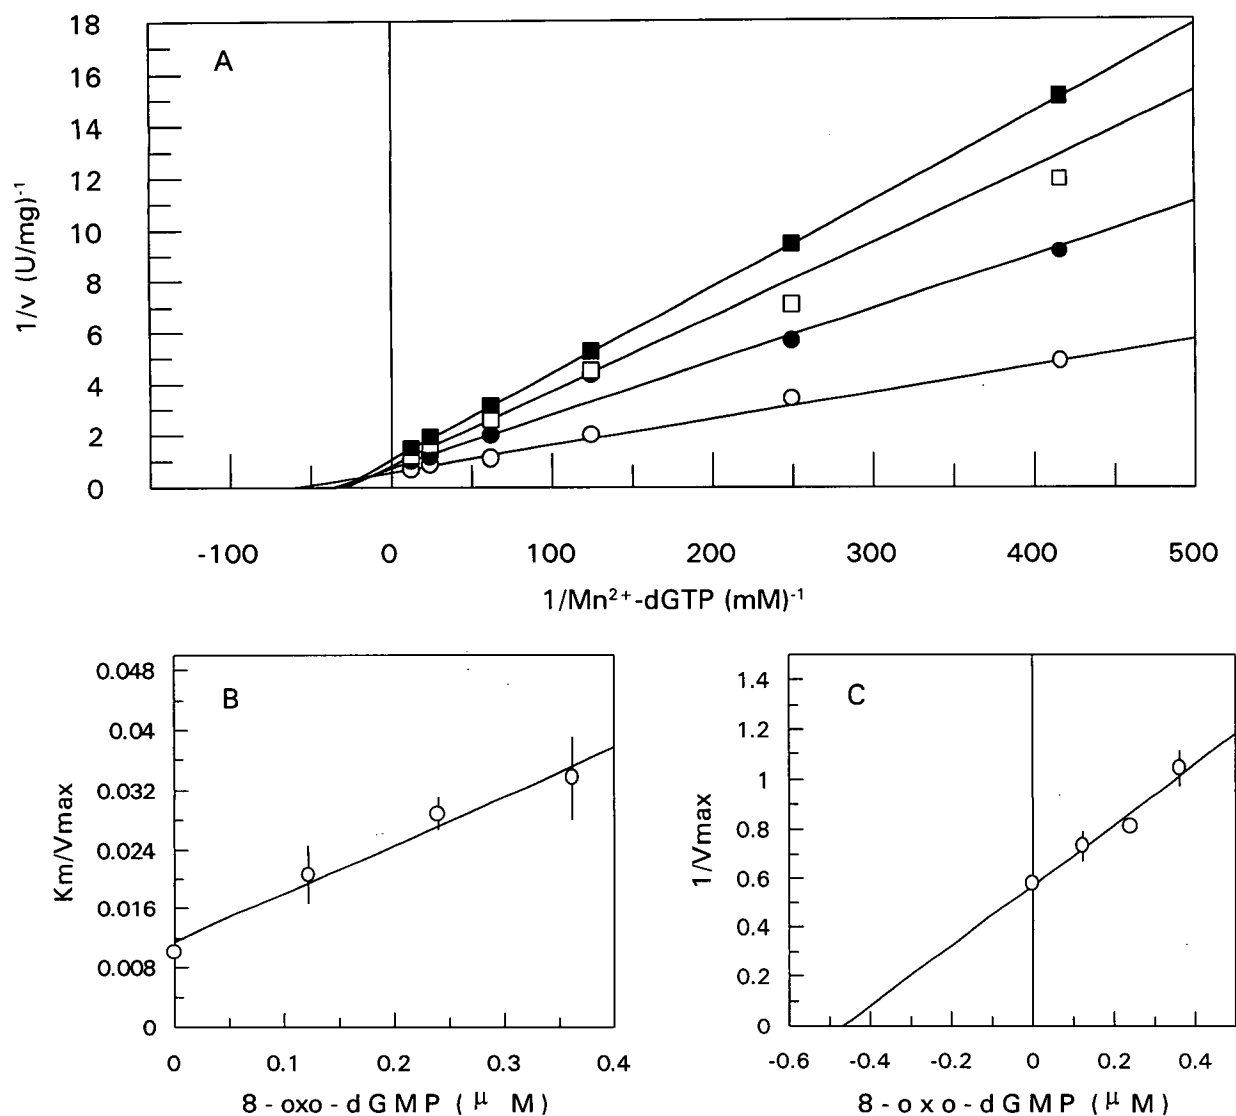

FIGURE S1: MutT inhibition by 8-oxo-dGMP with Mn<sup>2+</sup> as the activator. (A) Double reciprocal plot of initial velocity against Mn<sup>2+</sup>-dGTP at  $(2 + [8\text{-oxo-dGMP}/3] + [\text{dGTP}])$  mM MnCl<sub>2</sub>, and the following 8-oxo-dGMP concentrations: 0.0 (○), 0.12 (●), 0.24 (□), and 0.36  $\mu$ M (■). (B) Secondary plot of the slope ( $K_m/V_{max}$ ) versus 8-oxo-dGMP. (C) Secondary plot of the intercept ( $1/V_{max}$ ) versus 8-oxo-dGMP. Other components and conditions are the same as given in Figure 2.

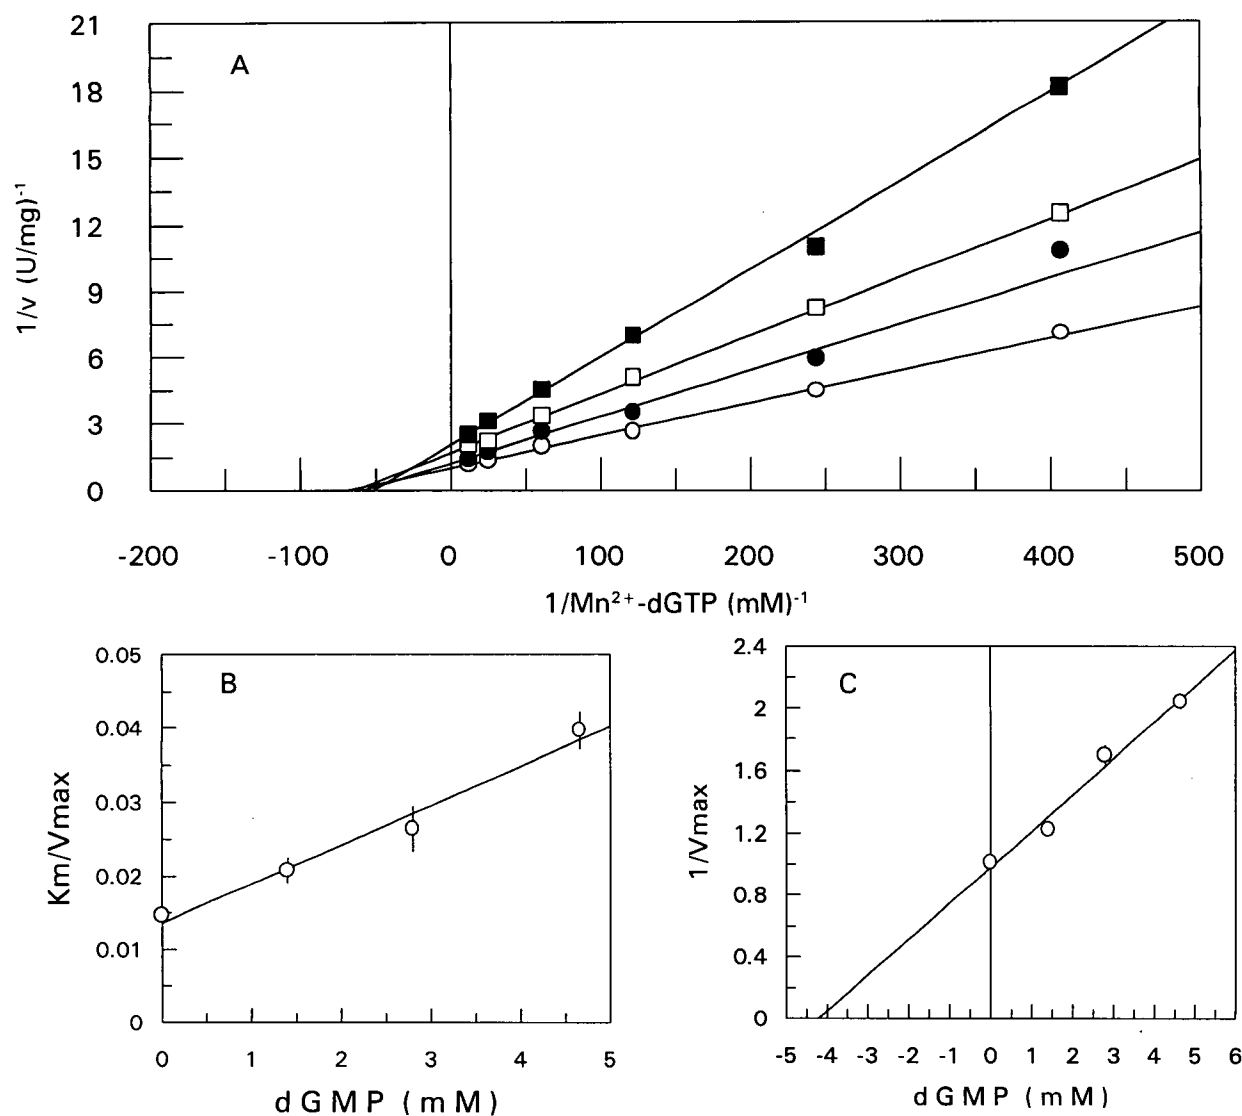

FIGURE S2: MutT inhibition by dGMP with Mn<sup>2+</sup> as the activator. (A) Double reciprocal plot of initial velocity against Mn<sup>2+</sup>-dGTP at  $(2 + [8\text{-oxo-dGMP}/3] + [\text{dGTP}])$  mM MnCl<sub>2</sub>, and the following dGMP concentrations: 0.0 (○), 1.40 (●), 2.80 (□), and 4.66 mM (■). (B) Secondary plot of the slope ( $K_m/V_{max}$ ) versus dGMP. (C) Secondary plot of the intercept ( $1/V_{max}$ ) versus dGMP. Other components and conditions are the same as given in Figure 2.
